# Supplementary material for: Cutaneous tactile sensitivity before and after tail loss and regeneration in the leopard gecko (Eublepharis macularius)
Source: Oxford University Press journal article supplement (doi:10.1242/jeb.234054), 2021-02-01
Supplement: jeb234054supp.pdf [file jeb234054supp.pdf]

Table S1. Gecko measurements before and after autotomy, for all experimental groups.

|                                             | Mass at<br>start of<br>experiment<br>(g) | Autotomized<br>tail mass (g) | Autotomized<br>tail mass as<br>a % of total<br>mass | Snout-vent<br>length at<br>start of<br>experiment<br>(mm) | Tail length<br>at start of<br>experiment<br>(mm) | Total<br>length at<br>start of<br>experiment<br>(mm) | Autotomized<br>tail length<br>(mm) | Autotomized<br>tail length as<br>a % of body<br>length | Mass at<br>end of<br>experiment<br>(g) | Snout-vent<br>length at<br>end of<br>experiment<br>(mm) | Tail length<br>at end of<br>experiment<br>(mm) |
|---------------------------------------------|------------------------------------------|------------------------------|-----------------------------------------------------|-----------------------------------------------------------|--------------------------------------------------|------------------------------------------------------|------------------------------------|--------------------------------------------------------|----------------------------------------|---------------------------------------------------------|------------------------------------------------|
| Control<br>geckos<br>n=4                    | 20.50                                    |                              |                                                     | 100                                                       | 80                                               | 180                                                  |                                    |                                                        | 26.5                                   | 100                                                     | 80                                             |
|                                             | 21.20                                    |                              |                                                     | 90                                                        | 80                                               | 170                                                  |                                    |                                                        | 26.6                                   | 95                                                      | 80                                             |
|                                             | 19.30                                    |                              |                                                     | 90                                                        | 80                                               | 170                                                  |                                    |                                                        | 26                                     | 110                                                     | 80                                             |
|                                             | 20.50                                    |                              |                                                     | 100                                                       | 80                                               | 180                                                  |                                    |                                                        | 27.7                                   | 100                                                     | 80                                             |
|                                             | <b>Mean</b>                              | <b>20.38</b>                 |                                                     | <b>95</b>                                                 | <b>80</b>                                        | <b>175</b>                                           |                                    |                                                        | <b>26.7</b>                            | <b>101.25</b>                                           | <b>90</b>                                      |
| s.e.m                                       | 0.39                                     |                              |                                                     | 2.89                                                      | 0                                                | 2.89                                                 |                                    |                                                        | 0.36                                   | 3.15                                                    | 0.00                                           |
|                                             |                                          |                              |                                                     |                                                           |                                                  |                                                      |                                    |                                                        |                                        |                                                         |                                                |
| Tail Loss<br>geckos,<br>day 9 group<br>n=5  | 21.7                                     | 3.8                          | 17.51                                               | 95                                                        | 75                                               | 170                                                  | 68                                 | 40.00                                                  | 20                                     | 100                                                     | 12                                             |
|                                             | 22.6                                     | 4.5                          | 19.91                                               | 100                                                       | 78                                               | 178                                                  | 68                                 | 38.20                                                  | 19.6                                   | 100                                                     | 15                                             |
|                                             | 22.7                                     | 4.6                          | 20.26                                               | 100                                                       | 75                                               | 175                                                  | 74                                 | 42.29                                                  | 19.5                                   | 95                                                      | 11                                             |
|                                             | 22.3                                     | 4.7                          | 21.08                                               | 100                                                       | 90                                               | 190                                                  | 72                                 | 37.89                                                  | 19                                     | 100                                                     | 11                                             |
|                                             | 24.2                                     | 4.6                          | 19.01                                               | 96                                                        | 75                                               | 171                                                  | 65                                 | 38.01                                                  | 20.2                                   | 95                                                      | 11                                             |
| <b>Mean</b>                                 | <b>22.7</b>                              | <b>4.44</b>                  | <b>19.55</b>                                        | <b>98.2</b>                                               | <b>78.6</b>                                      | <b>176.8</b>                                         | <b>69.4</b>                        | <b>39.28</b>                                           | <b>19.66</b>                           | <b>98</b>                                               | <b>12</b>                                      |
| s.e.m.                                      | 0.41                                     | 0.16                         | 0.61                                                | 1.11                                                      | 2.91                                             | 3.60                                                 | 1.6                                | 0.84                                                   | 0.21                                   | 1.22                                                    | 0.77                                           |
|                                             |                                          |                              |                                                     |                                                           |                                                  |                                                      |                                    |                                                        |                                        |                                                         |                                                |
| Tail loss<br>geckos,<br>day 32 group<br>n=5 | 22.8                                     | 4.1                          | 17.98                                               | 105                                                       | 80                                               | 185                                                  | 72                                 | 38.92                                                  | 23.2                                   | 110                                                     | 20                                             |
|                                             | 20.7                                     | 3.9                          | 18.84                                               | 90                                                        | 80                                               | 170                                                  | 70                                 | 41.18                                                  | 20.6                                   | 110                                                     | 10                                             |
|                                             | 20.7                                     | 3.8                          | 18.36                                               | 107                                                       | 80                                               | 187                                                  | 76                                 | 40.64                                                  | 20.7                                   | 100                                                     | 20                                             |
|                                             | 22.8                                     | 4.7                          | 20.61                                               | 95                                                        | 77                                               | 172                                                  | 71                                 | 41.28                                                  | 22.7                                   | 100                                                     | 20                                             |
|                                             | 21.1                                     | 4                            | 18.96                                               | 100                                                       | 80                                               | 180                                                  | 71                                 | 39.44                                                  | 22.2                                   | 110                                                     | 30                                             |
| <b>Mean</b>                                 | <b>21.62</b>                             | <b>4.10</b>                  | <b>18.95</b>                                        | <b>99.40</b>                                              | <b>79.40</b>                                     | <b>178.80</b>                                        | <b>72.00</b>                       | <b>40.29</b>                                           | <b>21.88</b>                           | <b>106.00</b>                                           | <b>20.00</b>                                   |
| s.e.m.                                      | 0.49                                     | 0.16                         | 0.45                                                | 3.14                                                      | 0.60                                             | 3.40                                                 | 1.05                               | 0.47                                                   | 0.53                                   | 2.45                                                    | 3.16                                           |
|                                             |                                          |                              |                                                     |                                                           |                                                  |                                                      |                                    |                                                        |                                        |                                                         |                                                |
| All tail loss<br>geckos n=10                |                                          |                              |                                                     |                                                           |                                                  |                                                      |                                    |                                                        |                                        |                                                         |                                                |
| <b>Mean</b>                                 | <b>22.16</b>                             | <b>4.27</b>                  | <b>19.25</b>                                        | <b>98.80</b>                                              | <b>79.00</b>                                     | <b>177.80</b>                                        | <b>70.70</b>                       | <b>39.79</b>                                           |                                        |                                                         |                                                |
| s.e.m.                                      | 0.35                                     | 0.12                         | 0.37                                                | 1.58                                                      | 1.41                                             | 2.36                                                 | 1.00                               | 0.49                                                   |                                        |                                                         |                                                |

**Table S2. Monofilament buckling force values.**

Calibrated with Denver Instrument SI-603 scale, measured in grams (g).

| Monofilament<br>Number | First<br>Measurement<br>(g) | Second<br>Measurement (g) | Average<br>(g) |
|------------------------|-----------------------------|---------------------------|----------------|
| 3                      | 0.094                       | 0.088                     | 0.091          |
| 4                      | 0.133                       | 0.124                     | 0.1285         |
| 5                      | 0.175                       | 0.154                     | 0.1645         |
| 6                      | 0.258                       | 0.256                     | 0.257          |
| 7                      | 0.383                       | 0.355                     | 0.369          |
| 8                      | 0.575                       | 0.534                     | 0.5545         |
| 9                      | 1.15                        | 1.088                     | 1.119          |
| 10                     | 2.381                       | 2.221                     | 2.301          |
| 11                     | 3.16                        | 3.3                       | 3.23           |
| 12                     | 6.395                       | 6.03                      | 6.2126         |

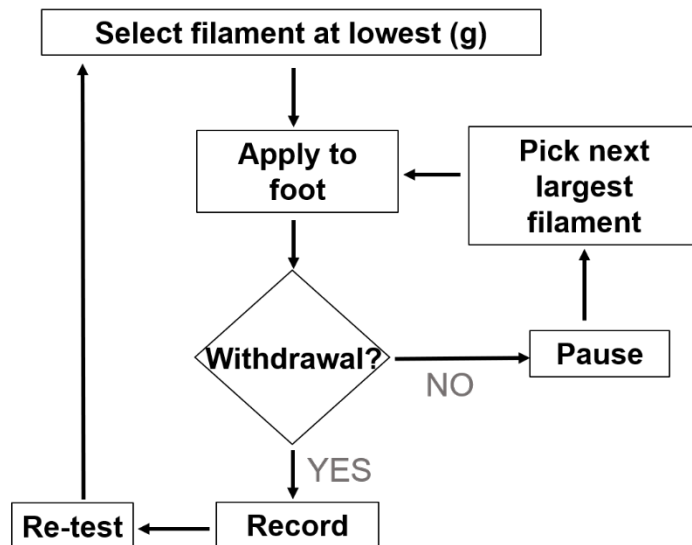

**Figure S1. Ascending stepwise monofilament method.**

The monofilament assay was performed following the protocol of Field et al. (1997), using an ascending stepwise approach. Testing began with the smallest gram monofilament, applied to the site of interest until buckling. A withdrawal response from the geckos consisted lifting of either the foot (when testing the forelimbs and hindlimbs), or body/tail (when testing the tail). If no withdrawal response was observed, the application was deemed negative, and the subsequent gram monofilament was applied. If positive, the response was recorded and a re-test was done. The average of the two thresholds was taken to be the cutaneous sensitivity threshold. Flow chart adapted from Bradman et al. (2015).
